# Supplementary material for: Mutation of regulatory phosphorylation sites in PFKFB2 worsens renal fibrosis
Source: PubMed Central journal article supplement (PMC7471692; doi:10.1038/s41598-020-71475-z), 2020-09-03
Supplement: 41598_2020_71475_MOESM1_ESM.pdf [file 41598_2020_71475_MOESM1_ESM.pdf]

## **MUTATION OF REGULATORY PHOSPHORYLATION SITES IN PFKFB2 WORSENS RENAL FIBROSIS**

MARDIANA LEE, GEOFF HARLEY, MARINA KATERELOS, KURT GLEICH, MITCHELL A. SULLIVAN, ADRIENNE LASKOWSKI, MELINDA COUGHLAN, SCOTT A. FRASER, PETER F. MOUNT, DAVID A. POWER.

### Supplementary Figures and Tables

**Page 2: Supplementary Figure 1.** PFKFB2 KI mice gene targeting strategy.

**Page 3: Supplementary Figure 2.** Macrophage accumulation in WT and PFKFB2 KI mice with UUO and FAN.

**Page 4: Supplementary Table 1.** Primer sequences for qRT-PCR.

**Page 5: Supplementary Figure 3a.** Full-length Western blot images for Fig 2A.

**Page 6: Supplementary Figure 3b.** Full-length Western blot images for Fig 2D.

**Page 7: Supplementary Figure 4.** Full-length Western blot images for Fig 4A.

**Page 8: Supplementary Figure 5a.** Full-length Western blot images for Fig 5A.

**Page 9: Supplementary Figure 5b.** Full-length Western blot images for Fig 5D.

**Page 10: Supplementary Figure 6a.** Full-length Western blot images for Fig 6A.

**Page 11: Supplementary Figure 6b.** Full-length Western blot images for Fig 6B.

**Page 12: Supplementary Figure 7a.** Full-length Western blot images for Fig 8A.

**Page 13: Supplementary Figure 7b.** Full-length Western blot images for Fig 8D.

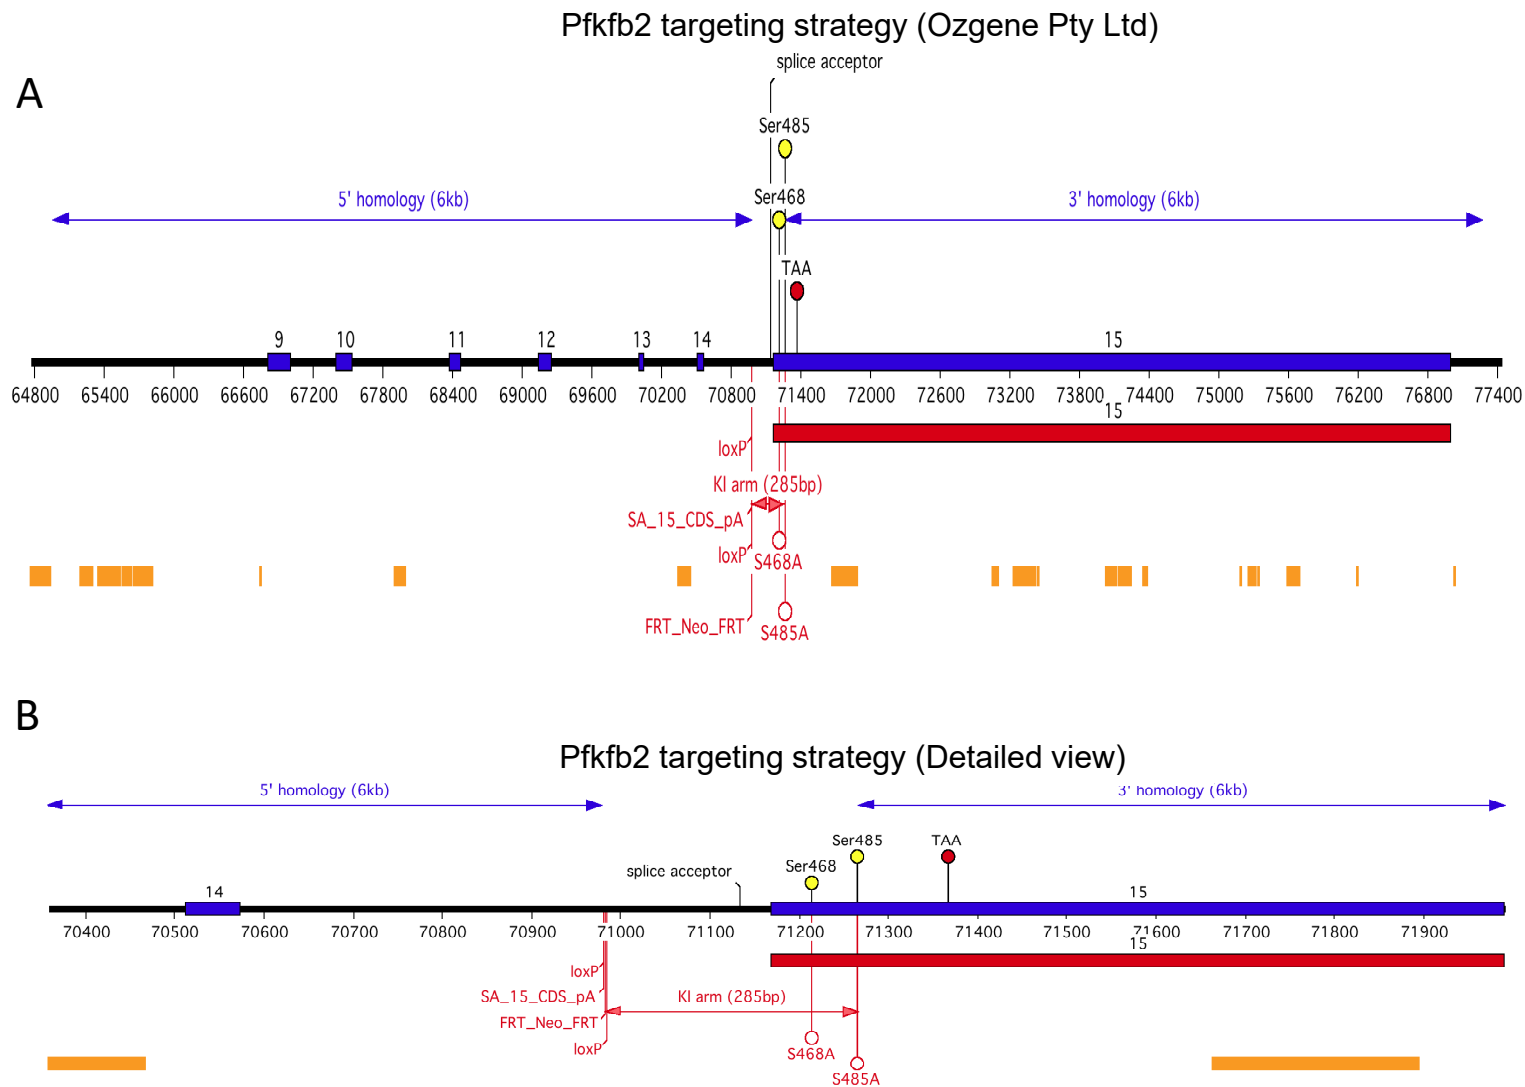

**Supplementary Figure 1. PFKFB2 KI mice gene targeting strategy. A: Overview; B: Detail.** Exon 15 is highlighted by a red bar. Red lines indicate insertion of targeting features. A floxed copy of exon 15's wild-type coding sequence (SA\_15\_CDS), followed by a polyadenylation signal (pA) was inserted into intron 14-15. The floxed segment included the neomycin marker (Neo), itself flanked by FRT sites. The Ser to Ala mutations were targeted into exon 15. The targeting vector homology arms are indicated by double blue arrows (not shown to scale in detail view). Figure provided by Ozgene Pty Ltd.

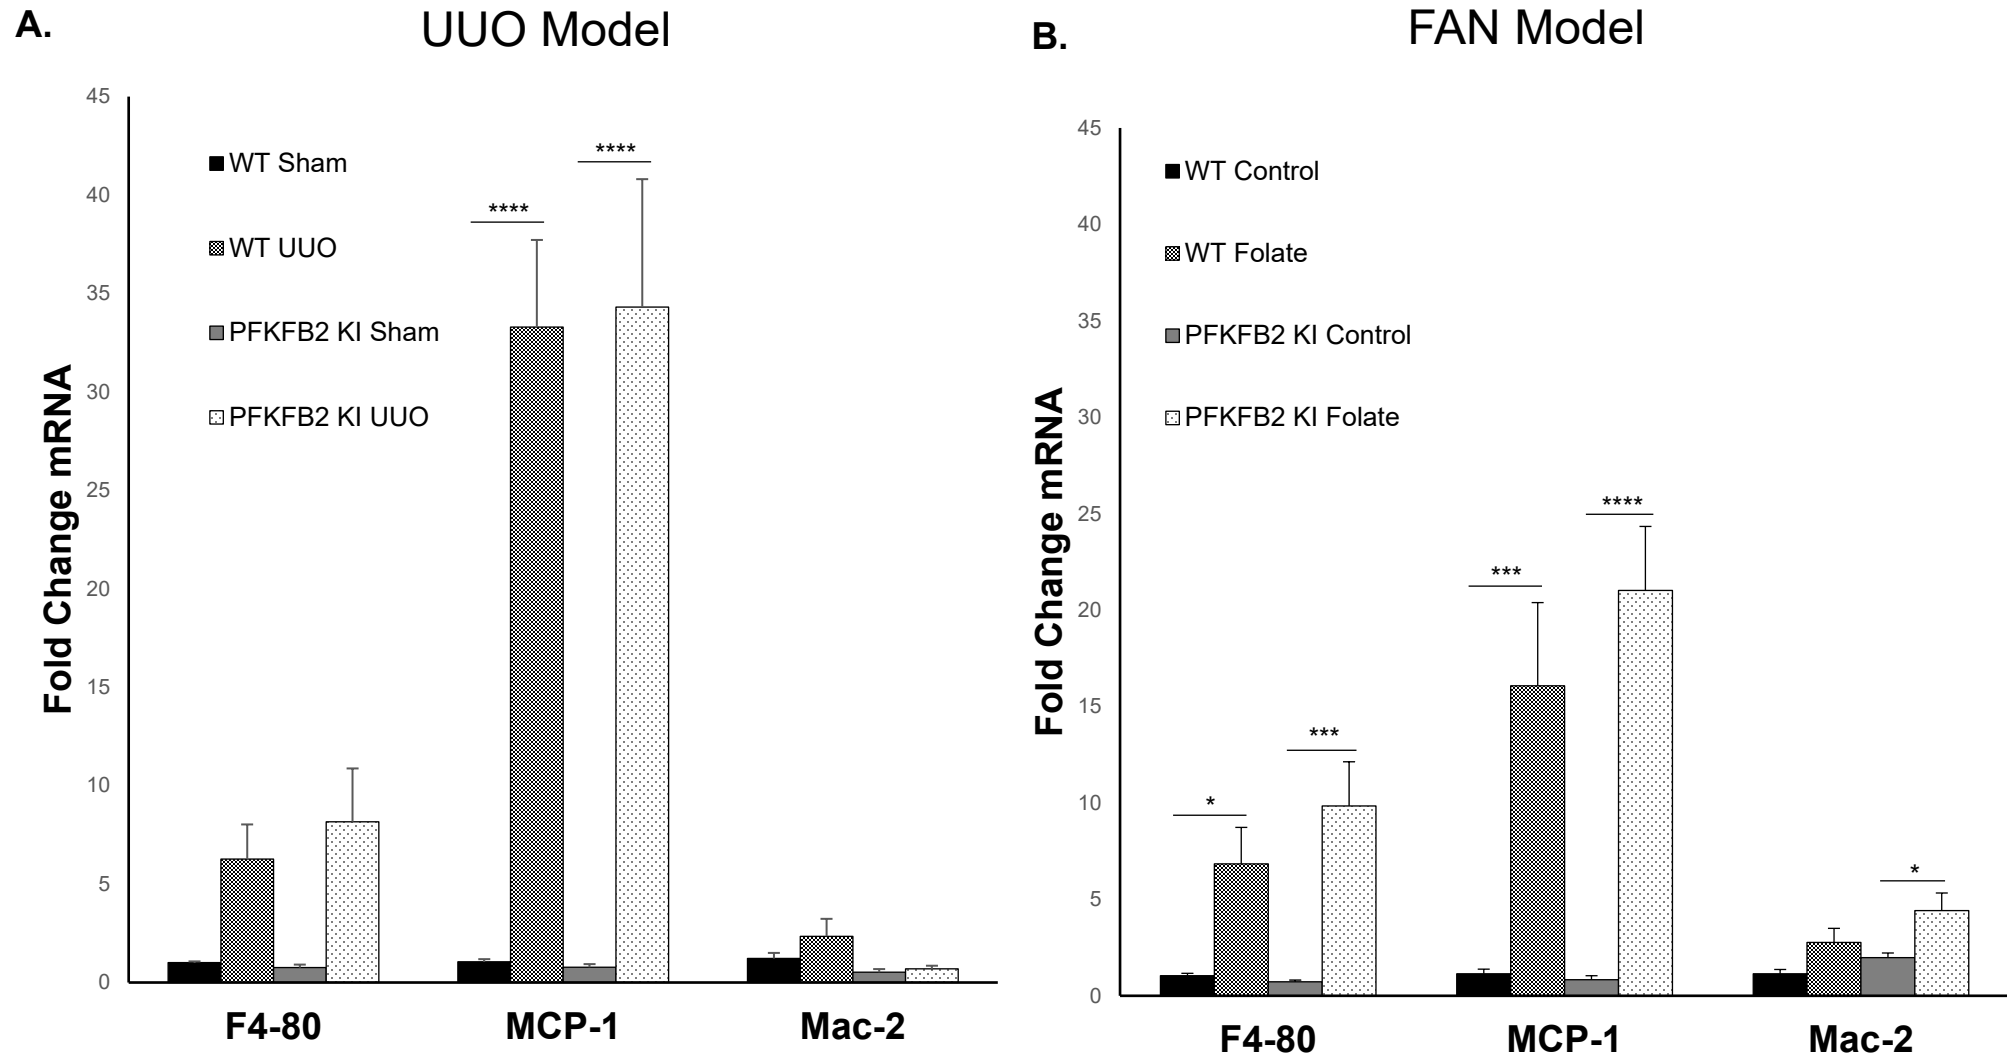

**Supplementary Figure 2.** Macrophage accumulation in WT and PFKFB2 KI mice with UUO and FAN. (A) RT-PCR analysis showing increased mRNA expression of F4-80, MCP-1 and Mac-2 in the UUO (A) and FAN (B) models. Although macrophages increased in both models, there was no difference between WT and PFKFB2 KI groups. \*  $P < 0.05$ , \*\*  $P < 0.01$ , \*\*\*  $P < 0.001$ , \*\*\*\*  $p < 0.0001$ . Mean + S.E.M.  $n = 7$  per group.

Supplementary Table 1. Primer sequences for qRT-PCR

| Gene Name     | Forward Primer          | Reverse Primer           |
|---------------|-------------------------|--------------------------|
| $\alpha$ -SMA | CAGGCATGGATGGCATCAATCAC | ACTCTAGCTGTGAAGTCAGTGTCG |
| Collagen 1A1  | TGACTGGAAGAGCGGAGAGT    | GTTCCGGGCTGATGTACCAG     |
| Collagen 3A1  | ACAGCTGGTGAACCTGGAAG    | ACCAGGAGATCCATCTCGAC     |
| Fibronectin   | CGAGGTGACAGAGACCACAA    | CTGGAGTCAAGCCAGACACA     |
| Cpt1          | GGTCTTCTCGGGTCGAAAGC    | TCCTCCCACCAGTCACTCAC     |
| ACox          | CTTGGATGGTAGTCCGGAGA    | TGGCTTCGAGTGAGGAAGTT     |
| GAPDH         | AAGGTCATCCCAGAGCTGAA    | CTGCTTCACCACCTTCTTGA     |
| F4/80         | TCCTGCTGTGTCGTGCTGTTC   | GCCGTCTGGTTGTCAGTCTTGTC  |
| MCP-1         | CAAGAAGGAATGGGTCCAGA    | GTGCTGAAGACCTTAGGGCA     |
| Mac-2         | GCTTATCCTGGCTCAACTG     | TTCACTGTGGCCCATGATTGT    |
| Hk(Hex)       | GGAGCAGTGGACCAGGGTA     | GAAGTTCAGCTGTTTTTGAATTG  |
| Glut1         | ACACTCACCACGCTTTGGTC    | ACACACCGATGATGAAGCGG     |
| Pfk1          | CCATGTTGTGGGTGTCTGAG    | ACAGGCTGAGTCTGGAGCAT     |

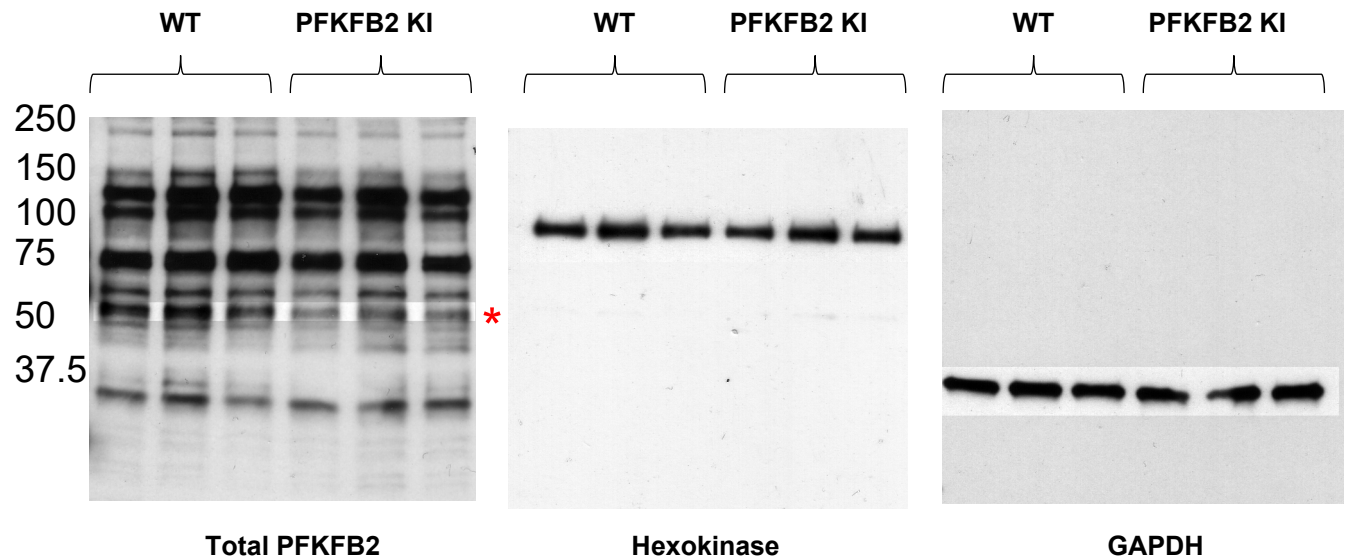

**Supplementary Figure 3a:** Full-length Western blot images for PFKFB2 (red asterisk denotes PFKFB2 band), Hexokinase and GAPDH representing Western blot images in Figure 2A.

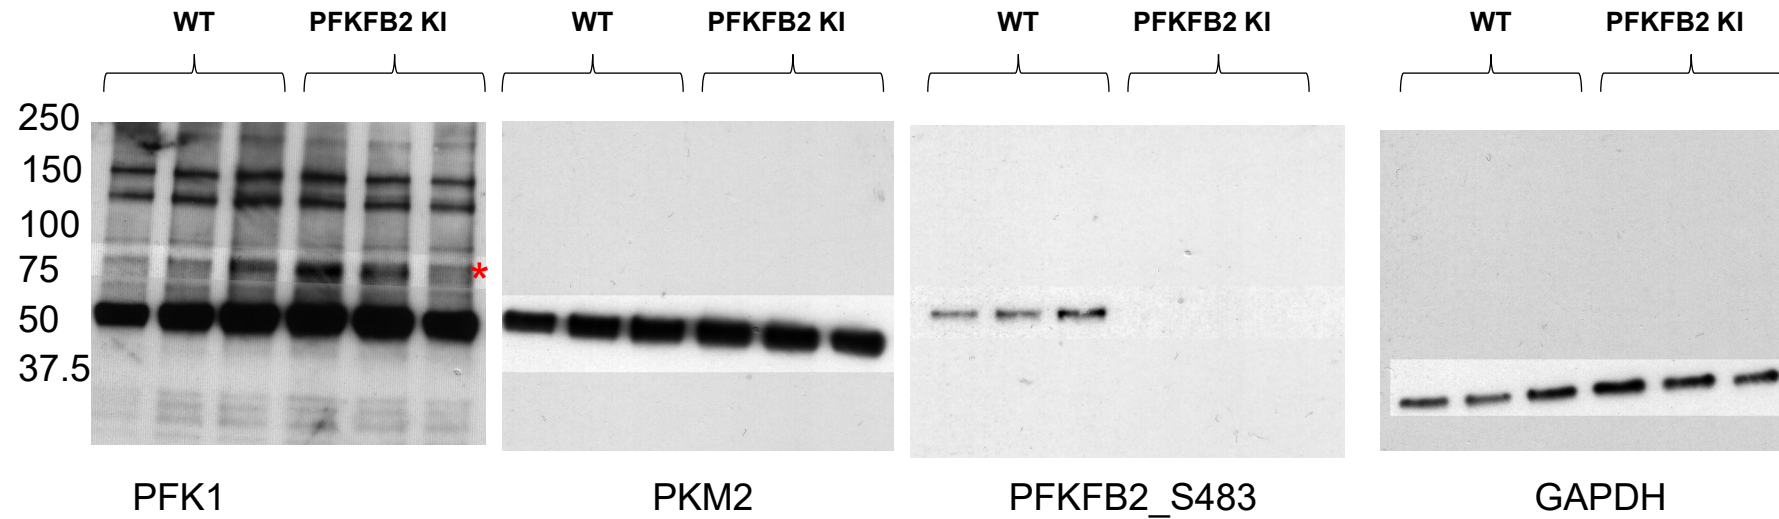

**Supplementary Figure 3b:** Full-length Western blot images for PFK1 (red asterisk denotes PFK1 band), PKM2, p-PFKFB2 and GAPDH representing Western blot images in Figure 2D.

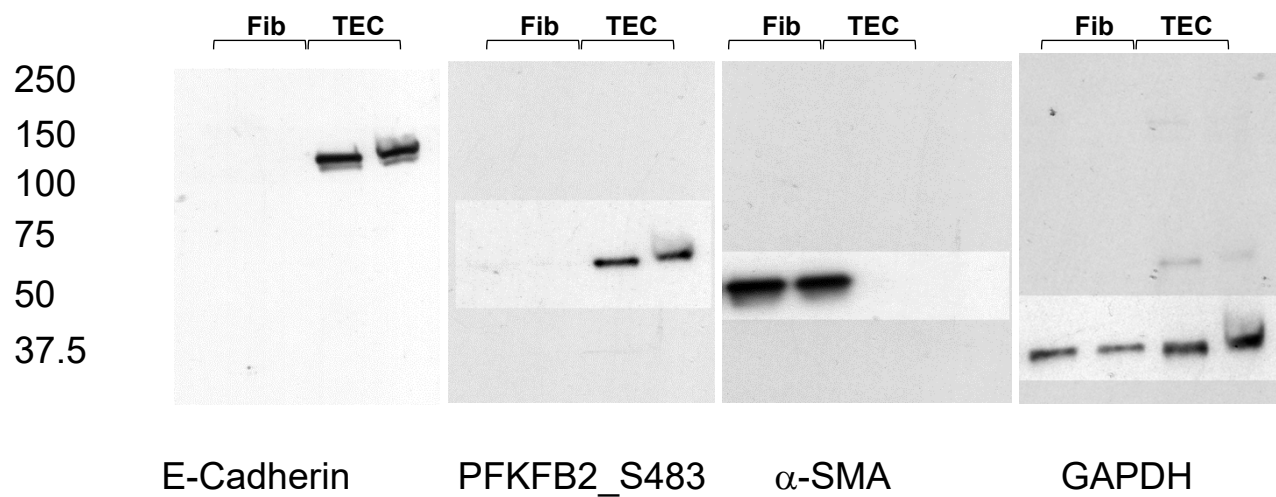

**Supplementary Figure 4:** Full-length Western blot images for E-Cadherin, p-PFKFB2,  $\alpha$ -SMA and GAPDH representing Western blot images in Figure 4A.

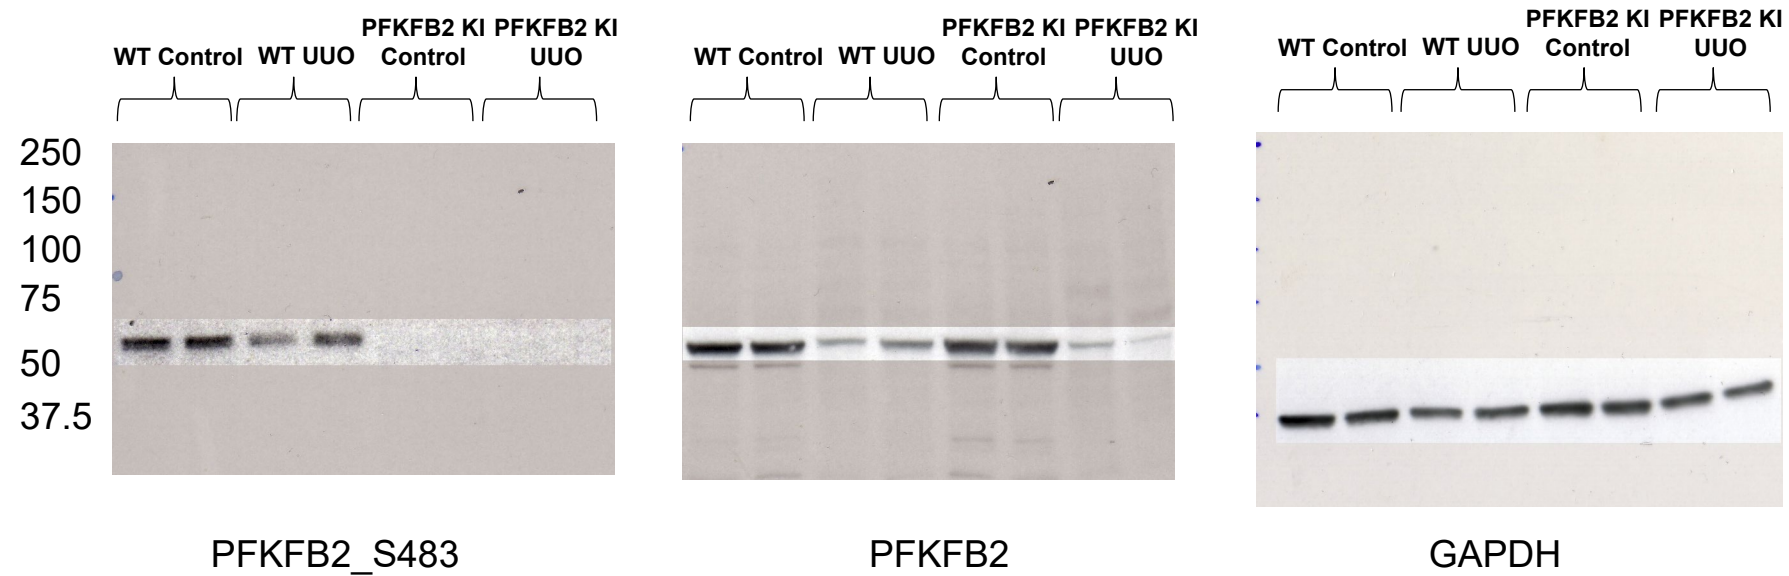

**Supplementary Figure 5a:** Full-length Western blot images for p-PFKFB2, PFKFB2 and GAPDH representing Western blot images in Figure 5A.



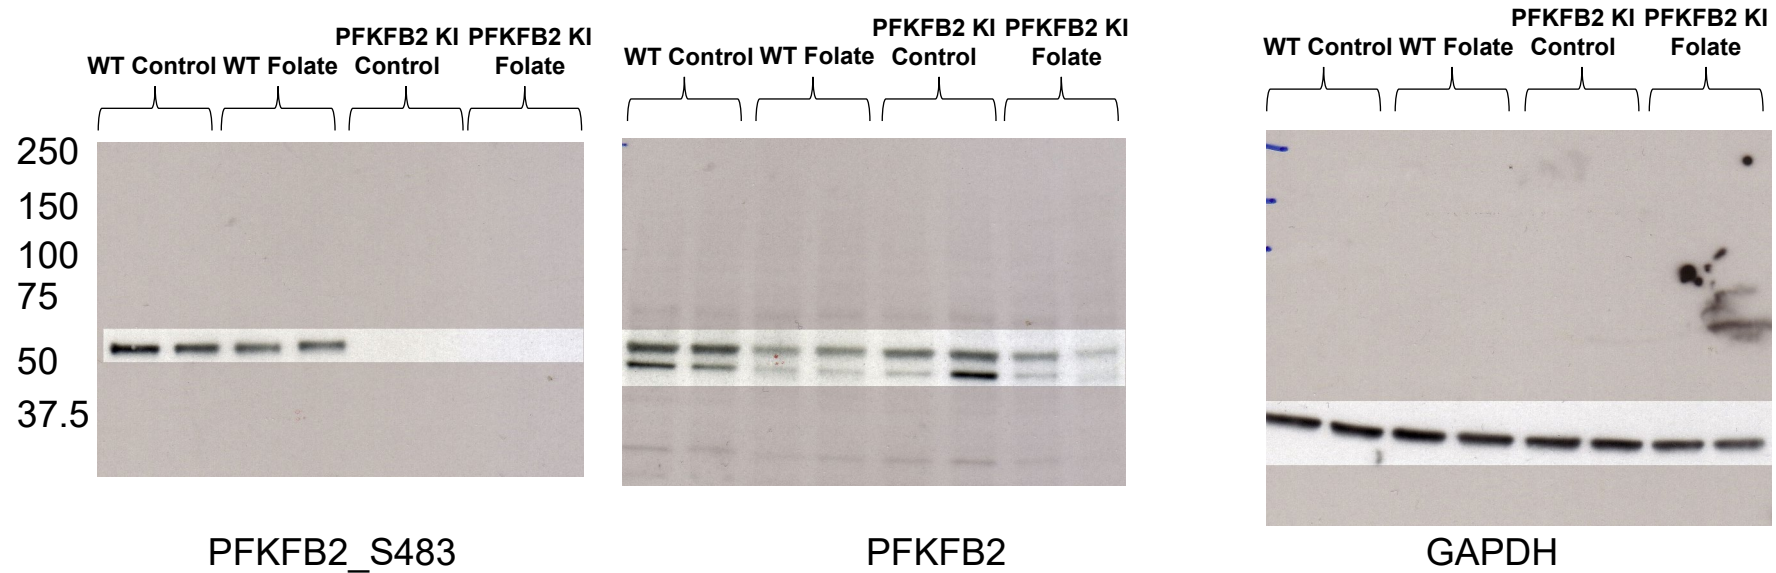

**Supplementary Figure 5b:** Full-length Western blot images for p-PFKFB2, PFKFB2 and GAPDH representing Western blot images in Figure 5D.

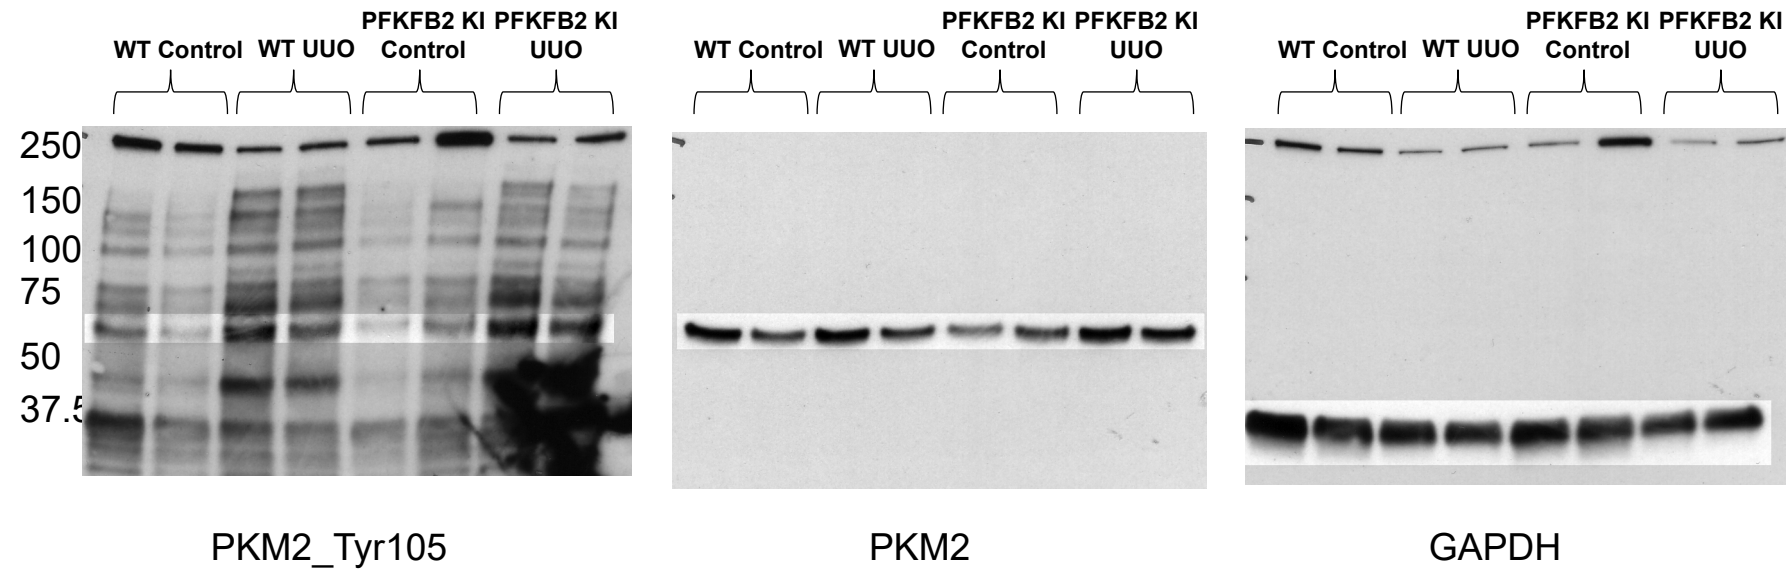

**Supplementary Figure 6a:** Full-length Western blot images for p-PKM2, PKM2 and GAPDH representing Western blot images in Figure 6A.

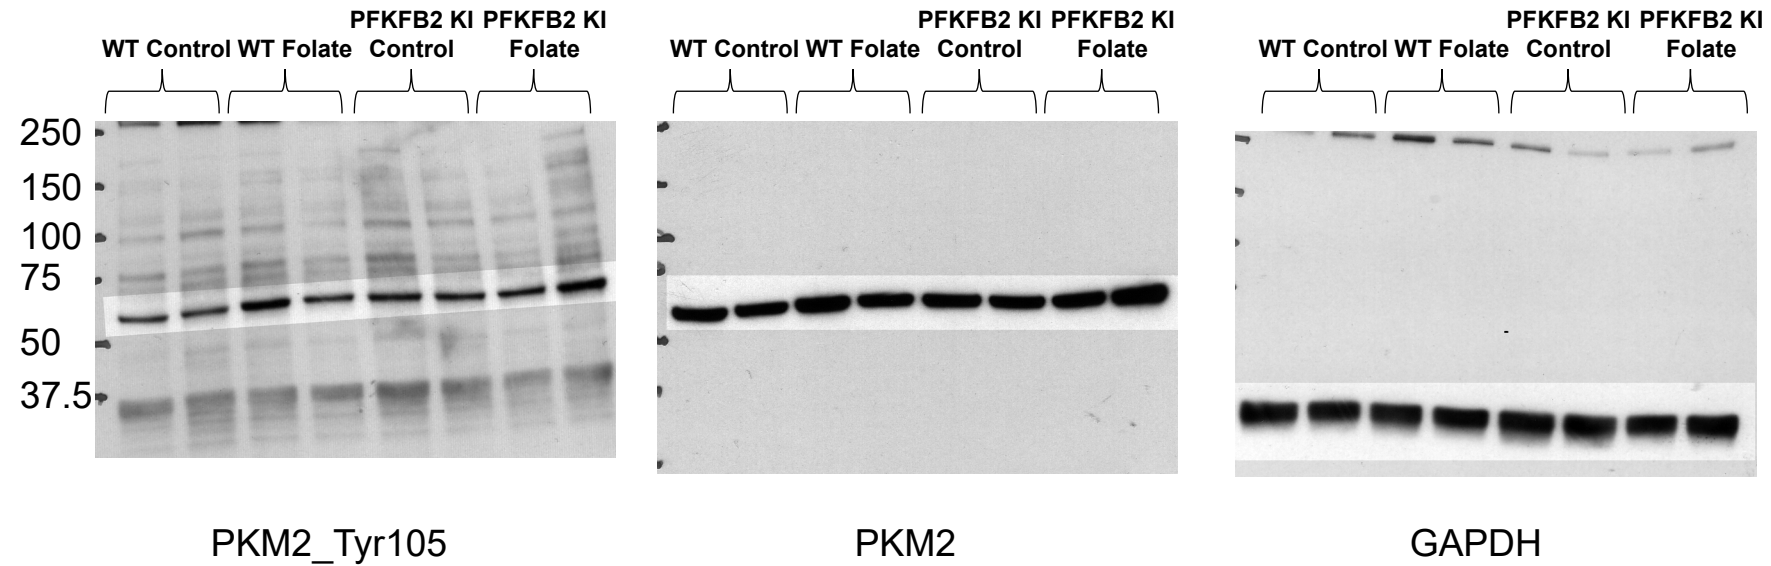

**Supplementary Figure 6b:** Full-length Western blot images for p-PKM2, PKM2 and GAPDH representing Western blot images in Figure 6B.

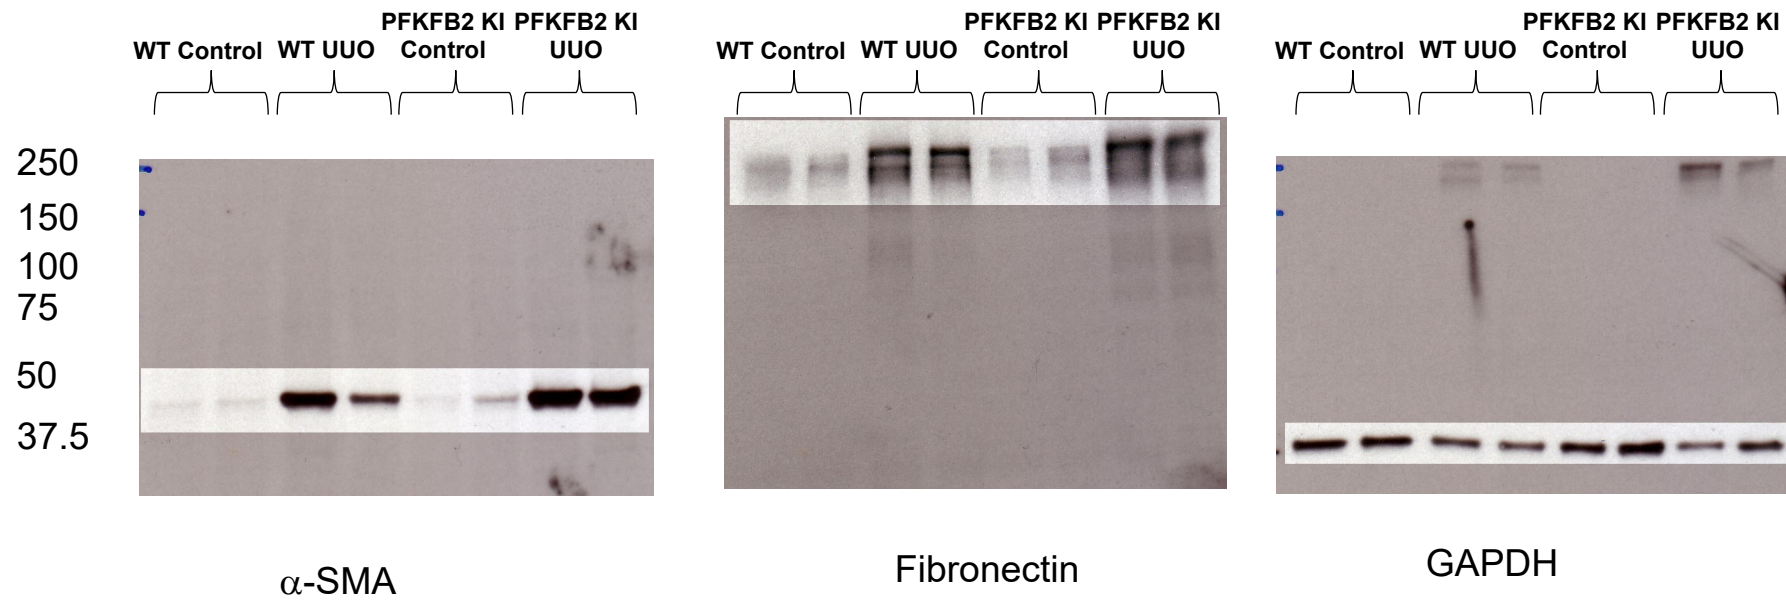

**Supplementary Figure 7a:** Full-length Western blot images for  $\alpha$ -SMA, Fibronectin and GAPDH representing Western blot images in Figure 8A.

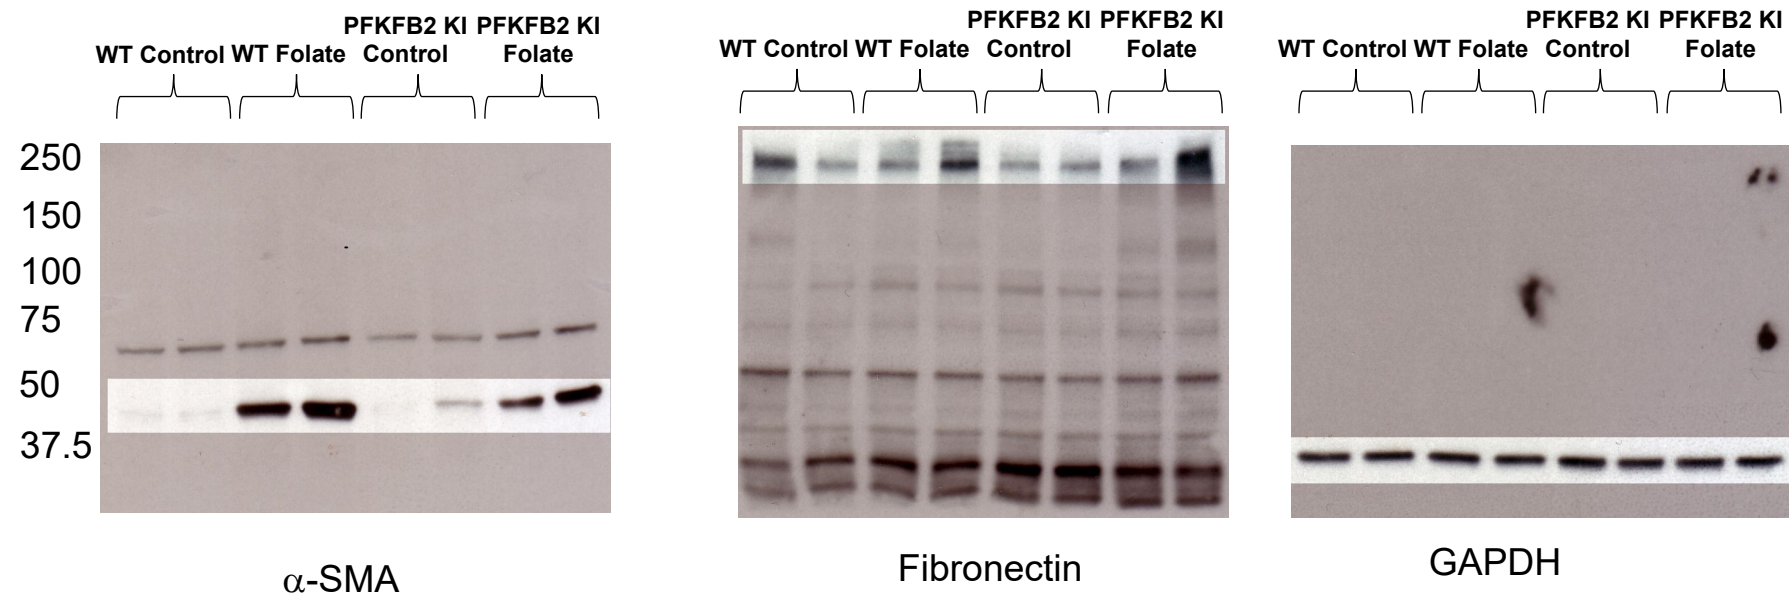

**Supplementary Figure 7b** Full-length Western blot images for  $\alpha$ -SMA, Fibronectin and GAPDH representing Western blot images in Figure 8B.
